longitudinal learning plans designed to guide physician-anesthesiologists through the complexities of MOC and other education initiatives critical for improving patient care and outcomes. The basic premise of the end result, as described by Moore, to improve patient outcomes and population health through education is the holy grail of CME and the overall desired outcome of ASA education.

### Acknowledgments

The author thanks Arnold Berry, M.D., M.P.H., American Society of Anesthesiologists, Park Ridge, Illinois, and Department of Anesthesiology, Emory University School of Medicine, Atlanta, Georgia, for critical review of this editorial.

### Competing Interests

The author is not supported by, nor maintains any financial interest in, any commercial activity that may be associated with the topic of this article.

### Correspondence

Address correspondence to Dr. Gambill: d.gambill@asahq.org

### References

1. Paddock BW: Postgraduate medical education. *N Engl J Med* 1939; 212:1069–74
2. Moore DE Jr, Green JS, Gallis HA: Achieving desired results and improved outcomes: Integrating planning and assessment throughout learning activities. *J Contin Educ Health Prof* 2009; 29:1–15

## ANESTHESIOLOGY REFLECTIONS FROM THE WOOD LIBRARY-MUSEUM

### An 1869 Engraving of the Ether Monument

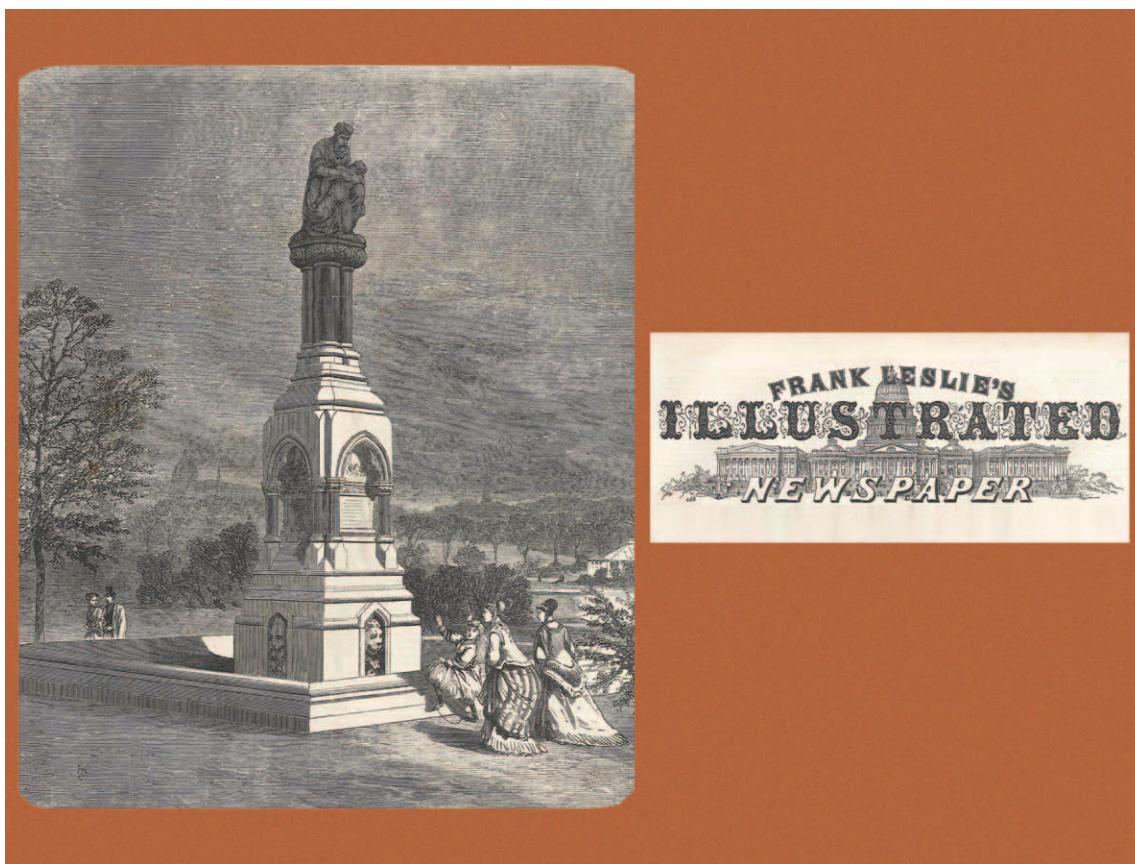

On June 12, 1869, *Frank Leslie's Illustrated Newspaper* published an engraving (left) of "The Ether Monument, in the Public Garden, Boston, Mass." According to *Leslie's*, the engraving was taken "From a Photograph by Whipple." The "Ether Monument" would soon be nicknamed the "Either Monument" since either Bostonian, Dr. William T.G. Morton or Dr. Charles T. Jackson, could be hailed as the discoverer of anesthesia. From outside Boston, other priority claims were pressed for Drs. Horace Wells of Hartford, Connecticut, and Crawford W. Long of Jefferson, Georgia. (Copyright © the American Society of Anesthesiologists, Inc.)

George S. Bause, M.D., M.P.H., Honorary Curator, ASA's Wood Library-Museum of Anesthesiology, Park Ridge, Illinois, and Clinical Associate Professor, Case Western Reserve University, Cleveland, Ohio. UJYC@aol.com.
